# Supplementary material
Source: HighWire-hosted journal article supplement (http://jneurosci.org/highwire/filestream/600087/field_highwire_adjunct_files/0/Supplemental_Figures.pdf)
Supplement: Supplemental_Figures.pdf [file Supplemental_Figures.pdf]

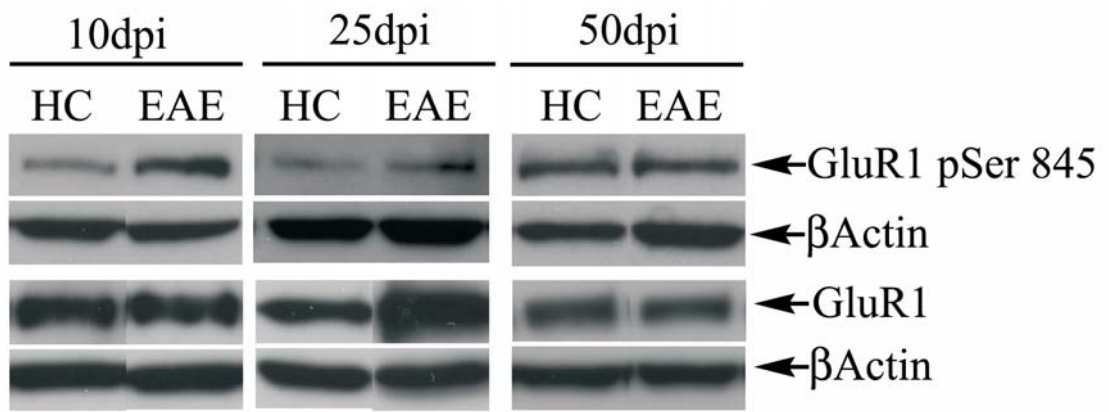

Supplementary figure 1

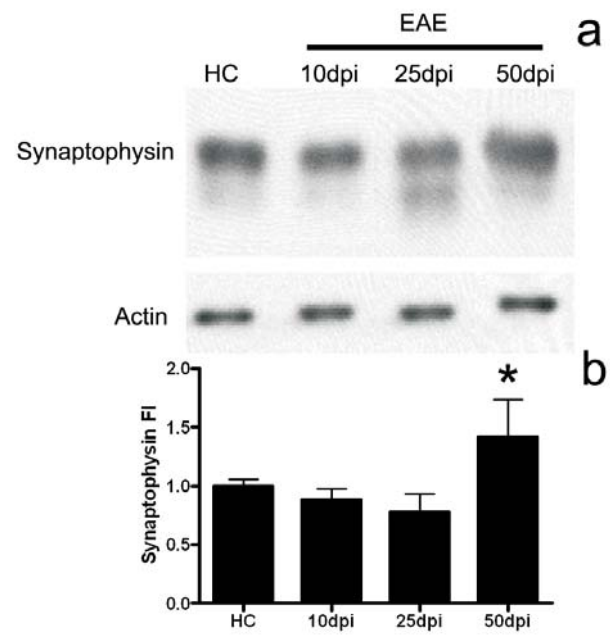

Supplementary figure 2

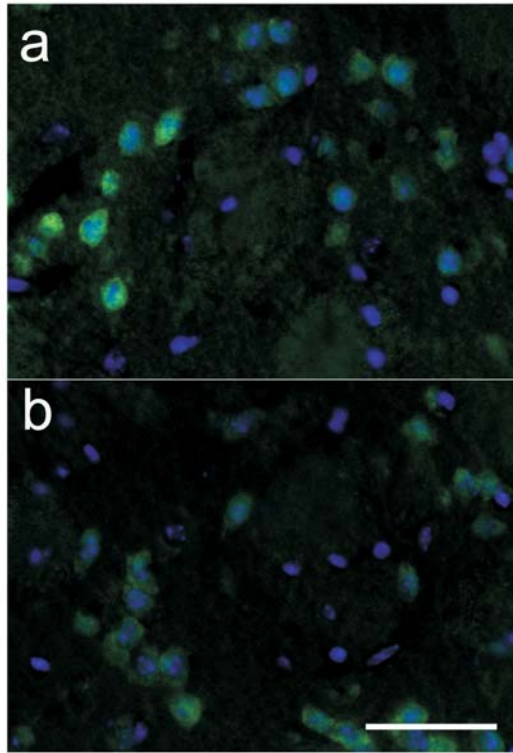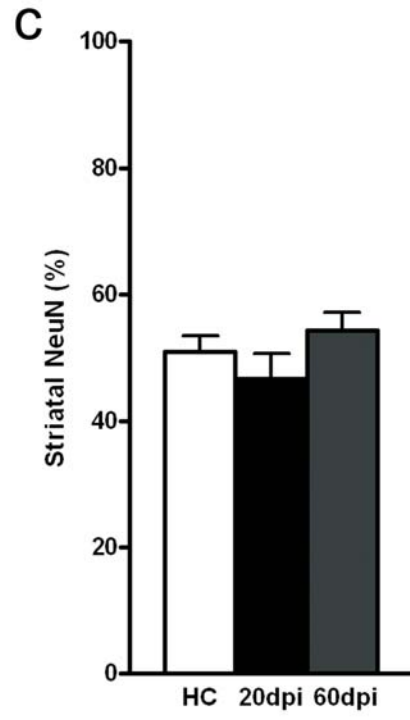

Supplementary figure 3

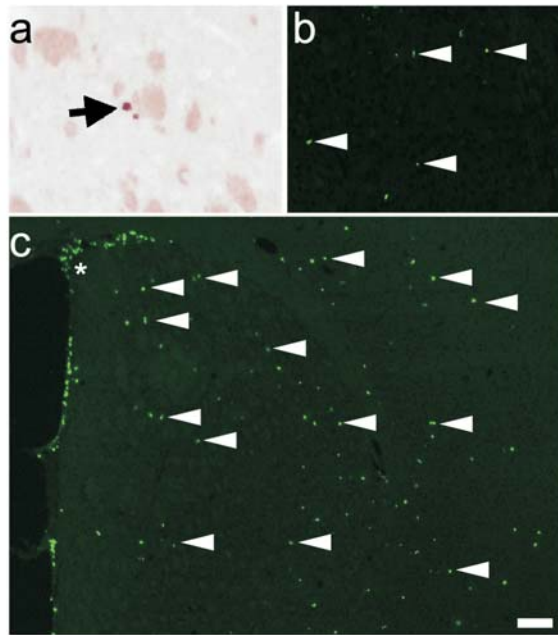

Supplementary figure 4

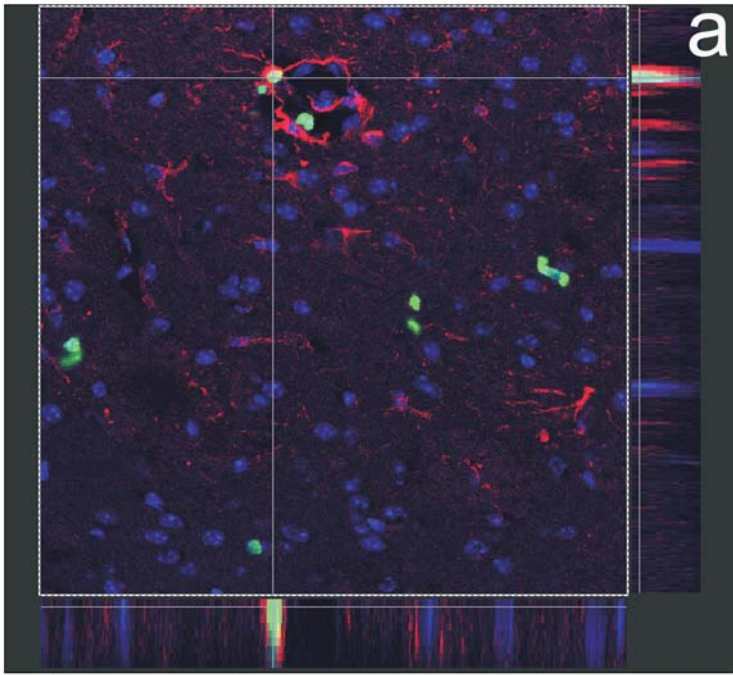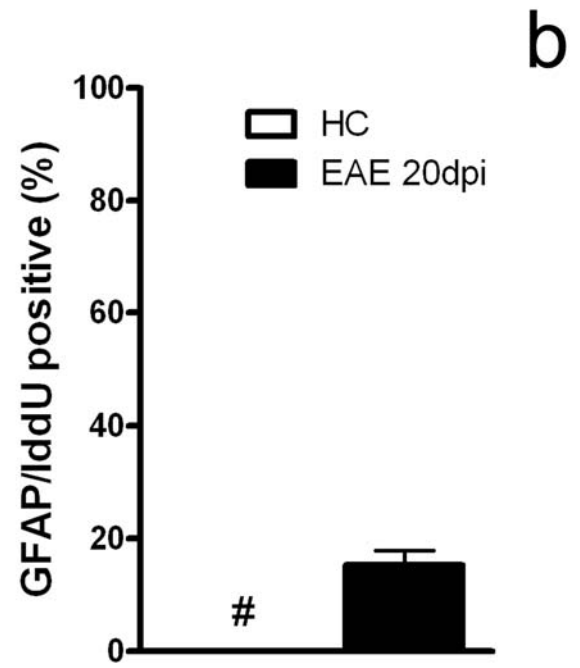

Supplementary figure 5
